# Supplementary material for: Predicting tipping points in mutualistic networks through dimension reduction
Source: PubMed Central journal article supplement — Proc Natl Acad Sci U S A. 2018 Jan 8;115(4):E639–47. doi: 10.1073/pnas.1714958115 (PMC5789925; doi:10.1073/pnas.1714958115), 2018-01-08
Supplement: pnas.1714958115.sapp.pdf [file pnas.1714958115.sapp.pdf]

SI Appendix for  
Predicting tipping points in mutualistic networks through dimension  
reduction

J.-J. Jiang, Z.-G. Huang, T. P. Seager, W. Lin, C. Grebogi, A. Hastings, and Y.-C. Lai

October 25, 2017

**Contents**

|                                                                                          |           |
|------------------------------------------------------------------------------------------|-----------|
| <b>SI Appendix figures</b>                                                               | <b>1</b>  |
| <b>SI Appendix Note 1: Derivation of the 2D reduced model</b>                            | <b>7</b>  |
| <b>SI Appendix Note 2: Description of the 59 real mutualistic networks</b>               | <b>10</b> |
| <b>SI Appendix Note 3: Steady state solutions of the pollinator and plant abundances</b> | <b>13</b> |
| <b>SI Appendix References</b>                                                            | <b>14</b> |

**SI Appendix figures**

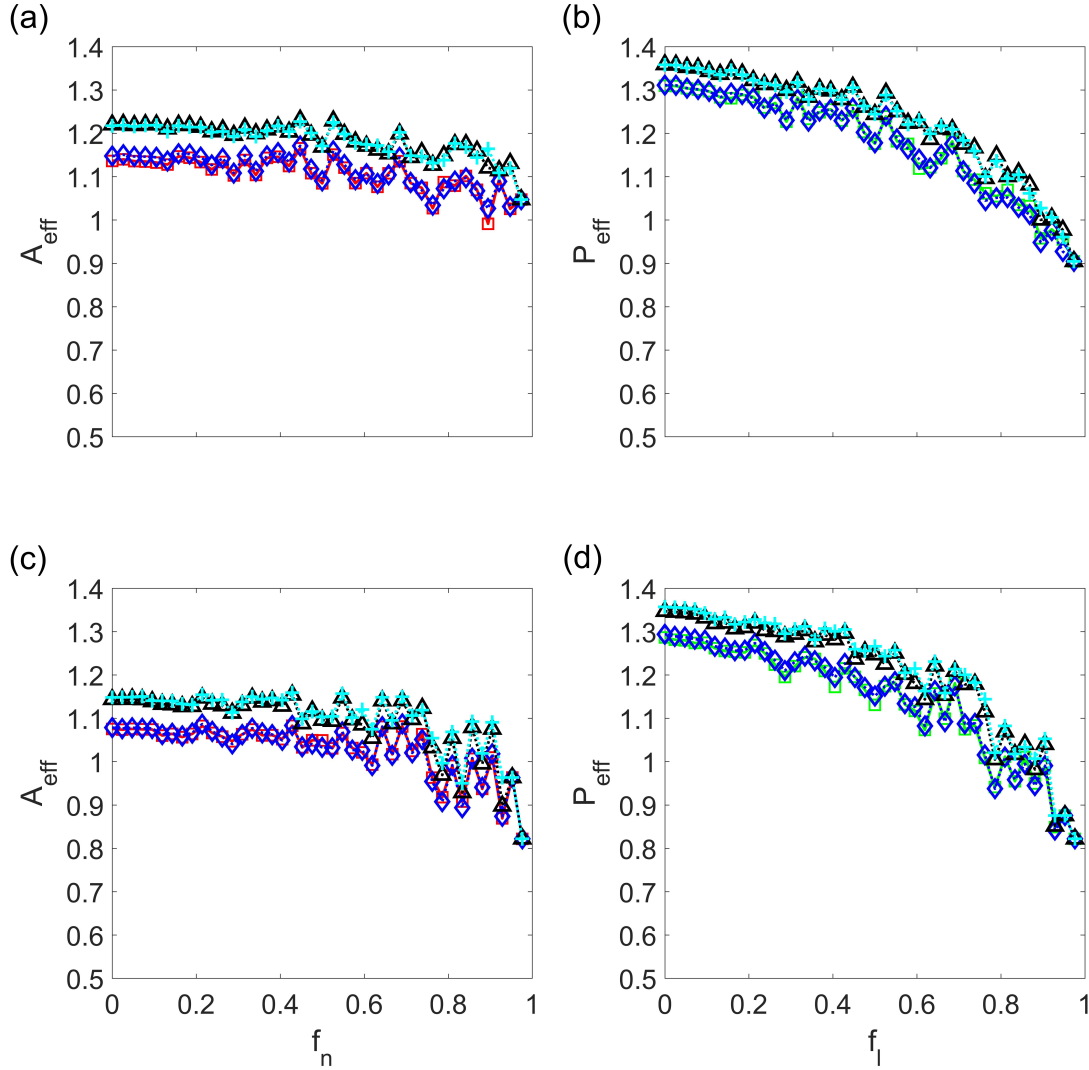

**fig. S1. Representative resilient functions in systems that do not exhibit a tipping point.** For networks  $A$  [panels (a,b)] and  $B$  [panels (c,d)], typical examples of resilient functions of pollinator abundance [panels (a,c)] versus  $f_n$ , the fraction of removed pollinators, and plant abundance [panels (b,d)] versus  $f_l$ , the fraction of removed mutualistic links corresponding to the value of  $f_n$  in panels (a,c). The curves with red squares are from the original networked system, while the curves with diamonds, triangles, and crosses are the corresponding individual resilient functions from reduced 2D model with averaging methods 1-3, respectively. The parameters are  $h = 0.7$ ,  $t = 0.5$ ,  $\beta_{ii}^{(A)} = \beta_{ii}^{(P)} = 1$ ,  $\alpha_i^{(A)} = \alpha_i^{(P)} = 0.3$ ,  $\mu_A = \mu_P = 0.0001$ ,  $\gamma_0 = 1$ , and  $\kappa = 0$ .

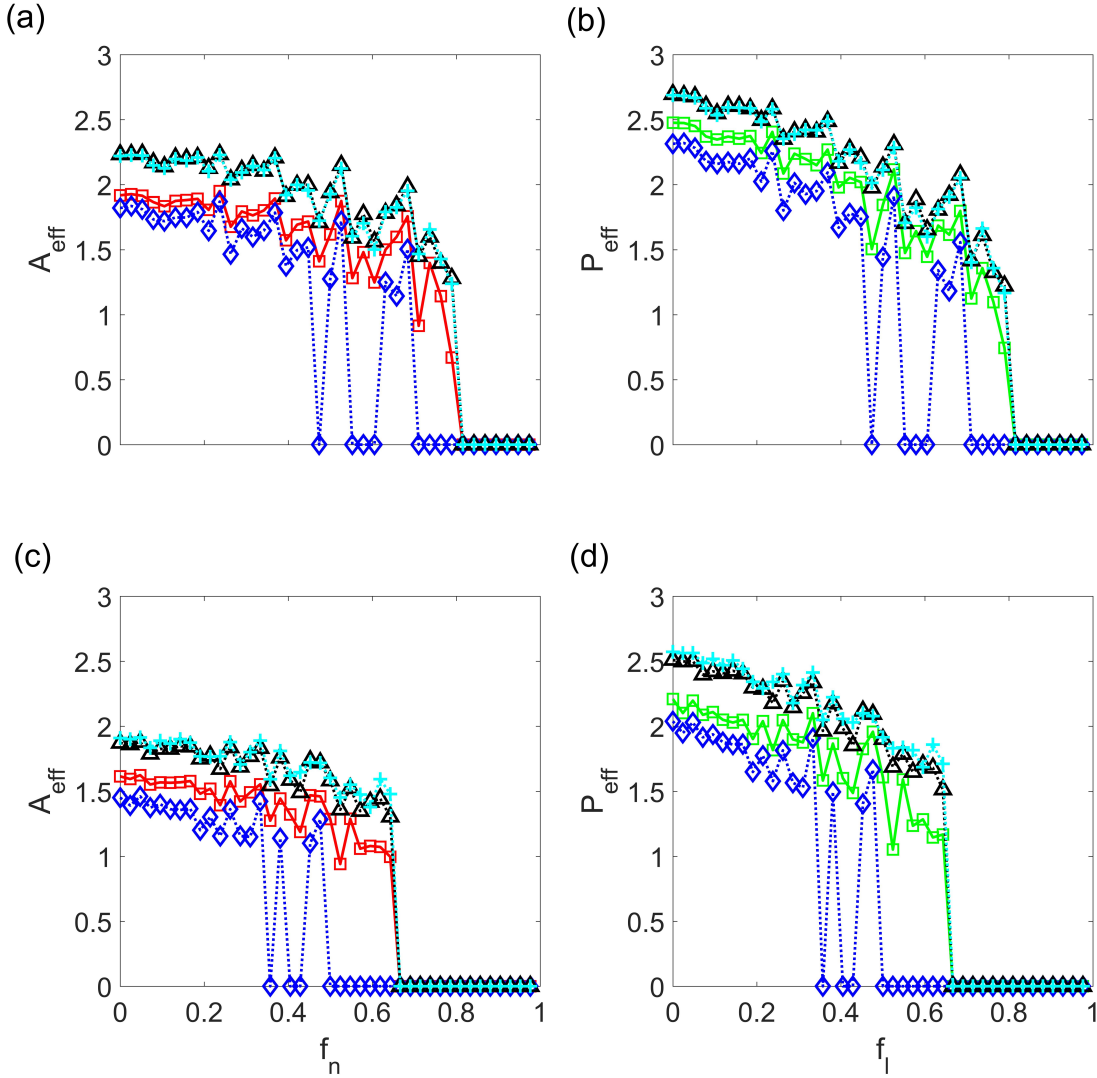

**fig. S2. Representative resilient functions in systems that exhibit a tipping point.** For networks  $A$  [panels (a,b)] and  $B$  [panels (c,d)], examples of resilient functions of pollinator abundance [panels (a,c)] versus  $f_n$ , the fraction of removed pollinators, and plant abundance [panels (b,d)] versus  $f_l$ , the fraction of removed mutualistic links corresponding to the value of  $f_n$  in panels (a,c). The curves with squares are from the original networked system, while the curves with diamonds, triangles, and crosses are the corresponding individual resilient functions from reduced 2D model with averaging methods 1-3, respectively. Before  $f_n$  (or  $f_l$  for plants) approaches unity, total collapse of the system can occur past a tipping point, at which the species abundances effectively become zero. The parameters are  $h = 0.2$ ,  $t = 0.5$ ,  $\beta_{ii}^{(A)} = \beta_{ii}^{(P)} = 1$ ,  $\alpha_i^{(A)} = \alpha_i^{(P)} = -0.3$ ,  $\mu_A = \mu_P = 0.0001$ ,  $\gamma_0 = 1$ , and  $\kappa = 0$ .

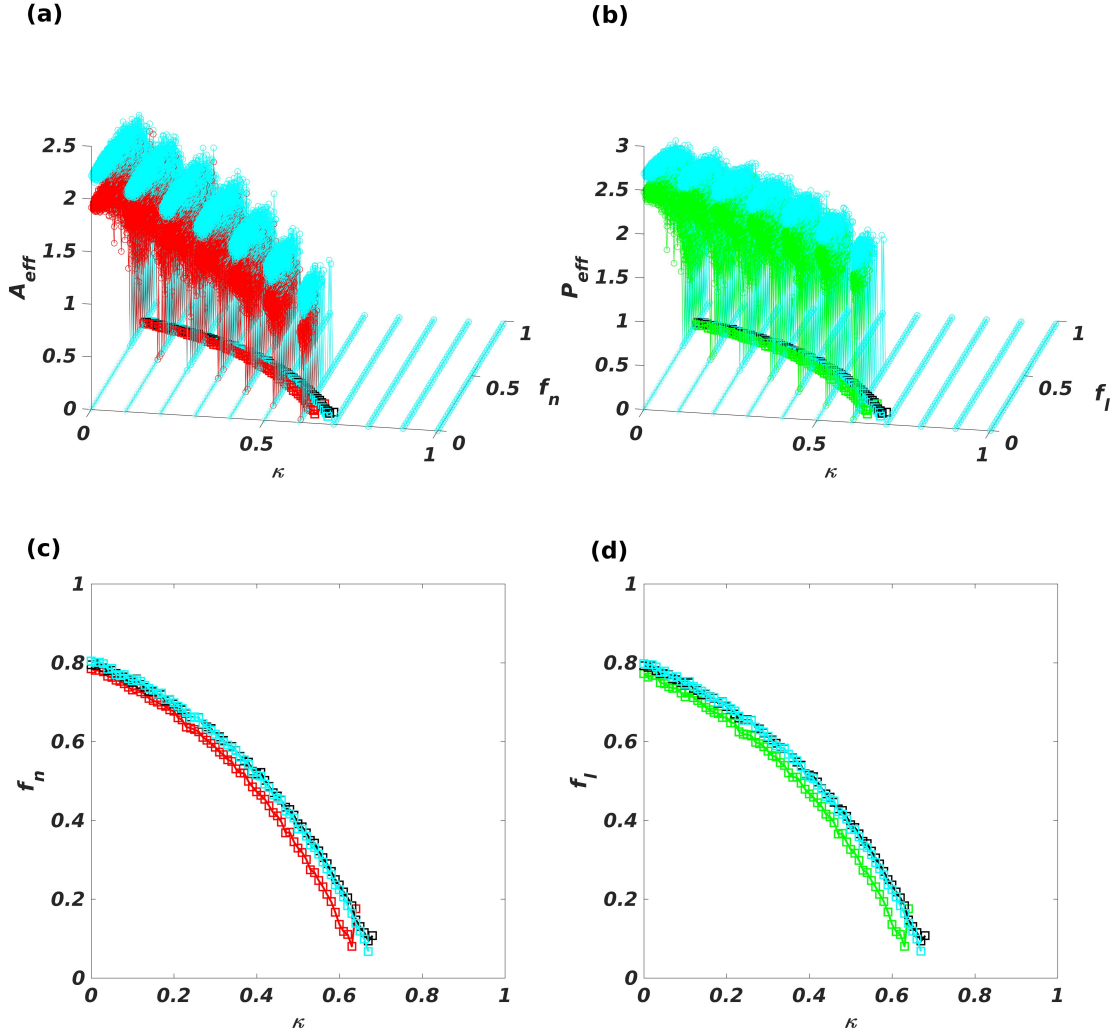

**fig. S3. Tipping point in two-dimensional parameter space for network A.** Panels (a,c) and (b,d) are for the pollinators and plants, respectively. The circles and asterisks in panels (a) and (b) are results from the original model with  $\delta\kappa = 0.1$ , and the cyan curves are results from the reduced model obtained through the eigenvector weighted averaging method. The circles and asterisks curves in both panels indicate the cases where the initial species abundance is high (10) and low (0.01), respectively. Each point on the red squared curve represents the ensemble averaged critical  $f_n$  value (with 100 realizations) for a fixed value of  $\kappa$ , where  $\delta\kappa = 0.01$ . The black and cyan square curves are the average abundances predicted by the reduced models with degree-weighted and eigenvector weighted averaging, respectively. Panels (c,d) indicate the critical curve of tipping point in the parameter plane. For each value of  $f_n$  (or, equivalently,  $f_l$ ) and  $\kappa$ , 100 network realizations are used. Other parameters are the same as those in Fig. 4 in the main text. These results indicate that our reduced model with the weighted averaging method can accurately predict the tipping point in the two-dimensional parameter space.

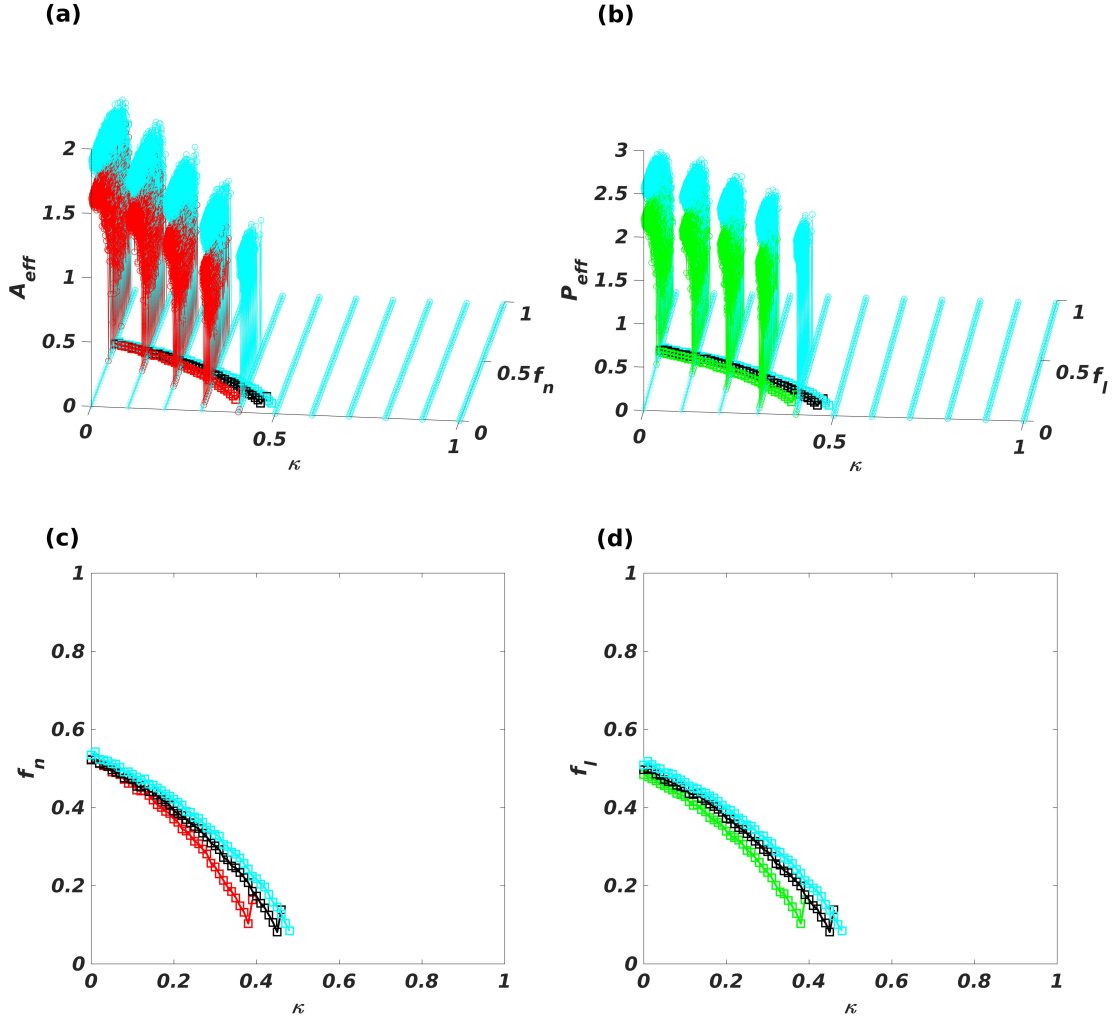

**fig. S4. Tipping point in two-dimensional parameter space for network B.** Panels (a,c) and (b,d) are for the pollinators and plants, respectively. The circles and asterisks in panels (a) and (b) are results from the original model with  $\delta\kappa = 0.1$ , and the cyan curves are results from the reduced model obtained through the eigenvector weighted averaging method. The circles and asterisks curves in both panels indicate the cases where the initial species abundance is high (10) and low (0.01), respectively. Each point on the red squared curve represents the ensemble averaged critical  $f_n$  value (with 100 realizations) for a fixed value of  $\kappa$ , where  $\delta\kappa = 0.01$ . The black and cyan square curves are the average abundances predicted by the reduced models with degree-weighted and eigenvector weighted averaging, respectively. Panels (c,d) indicate the critical curve of tipping point in the parameter plane. For each value of  $f_n$  (or, equivalently,  $f_l$ ) and  $\kappa$ , 100 network realizations are used. Other parameters are the same as those in Fig. 9 in the main text. These results indicate that our reduced model with the weighted averaging method can accurately predict the tipping point in the two-dimensional parameter space.

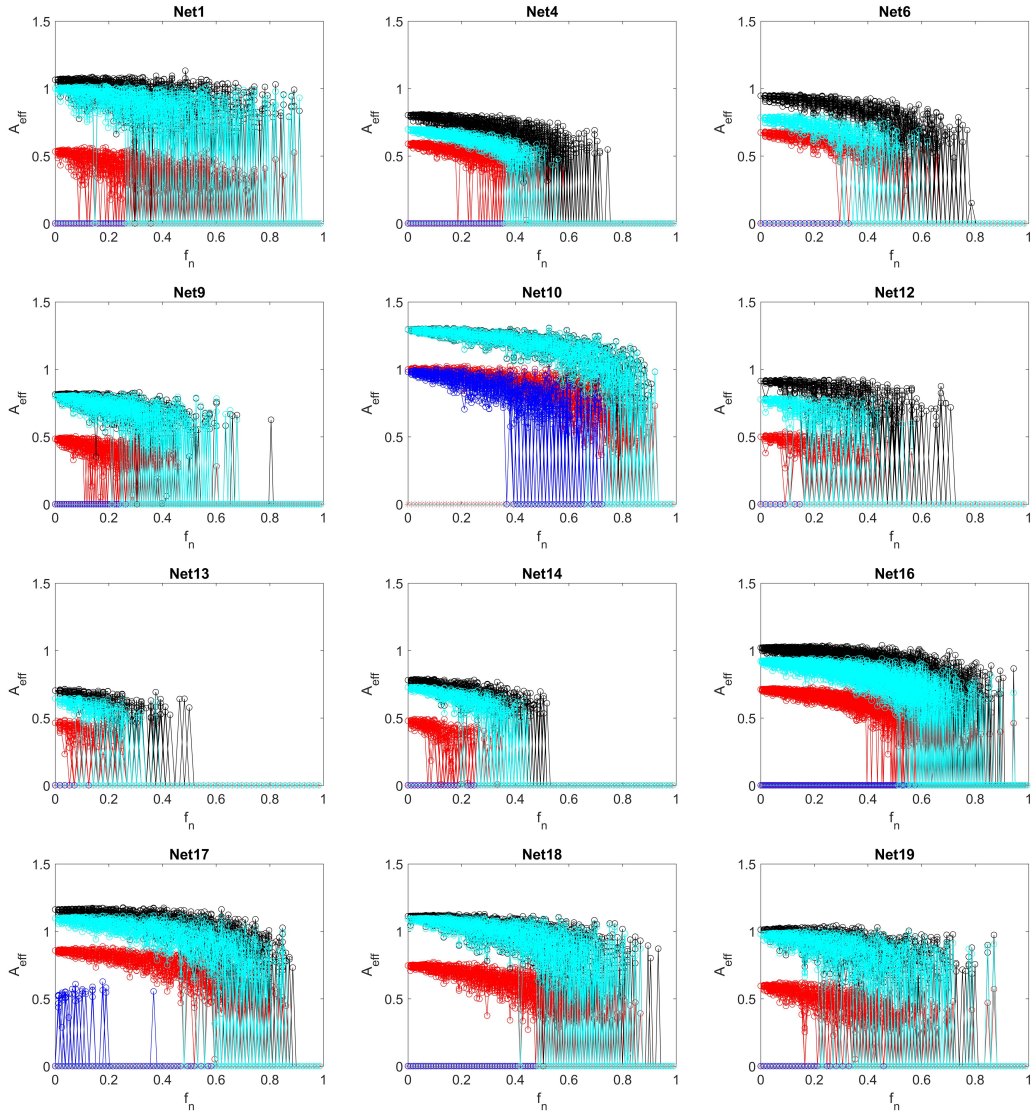

**fig. S5. Predicting tipping point for one dozen representative mutualistic networks from the set of 59 real networks.** The red curves are the average pollinator and plant abundance, respectively, from the original system. The blue, black and cyan curves in all the panels are the abundances from the reduced 2D system using the averaging methods 1-3, respectively. The circles asterisks in all panels correspond to cases where the initial abundance value relatively high (10) and low (0.01), respectively. For each value of  $f_n$  (or  $f_l$ ), results from 100 statistical realizations are displayed. The model parameters are  $h = 0.4$ ,  $t = 0.5$ ,  $\beta_{ii}^{(A)} = \beta_{ii}^{(P)} = 1$ ,  $\alpha_i^{(A)} = \alpha_i^{(P)} = -0.3$ ,  $\mu_A = \mu_P = 0.0001$ , and  $\gamma_0 = 1$ .

## SI Appendix Note 1: Derivation of the 2D reduced model

Our dimension reduction process is based on the following two assumptions. Firstly, the decay parameters for all the pollinators have an identical value:  $\kappa_i \equiv \kappa$ . There is a qualitative correspondence between  $\kappa$  and the state of the environment in that a deteriorating environment for species implies an increased value of  $\kappa$ . Thus, as  $\kappa$  is increased, extinction of species can occur. The tipping point of the system is defined as the critical value of  $\kappa$  beyond which all species are extinct. Secondly, for structural perturbation, we assume that pollinators die from the mutualistic network one after another as a result of increasingly deteriorating environment. As the fraction of disappearing pollinators is increased, a total collapse of all the species can occur. Due to the removal of the mutualistic links, a complete collapse of the plant species can occur at the same time, defining a tipping point of the system as a result of structural perturbation on the network.

Given a high-dimensional mutualistic network, the reduced dynamical system contains two coupled ODEs: one for the pollinators and another for the plants. The basic idea of dimension reduction is to characterize the “information” about the network topology by an effective dynamical parameter. The process consists of the following three steps.

Firstly, we obtain the effective (average) abundances of the plants and the pollinators. From Eq. (1) in the main text, we have

$$\alpha_i^{(P)} P_i \cong \alpha P_{eff} \quad \text{and} \quad \alpha_i^{(A)} A_i \cong \alpha A_{eff}, \quad (\text{S1})$$

where  $P_{eff}$  and  $A_{eff}$  the effective abundances of the plants and the pollinators, respectively. Secondly, since species do not out-compete each other when mutualistic partners are absent [1], intraspecific competitions can be assumed to be stronger than the interspecific competitions, leading to

$$\beta_{ii}^{(P)} \gg \beta_{ij}^{(P)} \quad \text{and} \quad \beta_{ii}^{(A)} \gg \beta_{ij}^{(A)}. \quad (\text{S2})$$

For simplicity, we can totally neglect the interspecific competitions. The terms describing the species competitions in Eq. (1) in the main text can then be written as

$$\sum_{j=1}^{S_P} \beta_{ij}^{(P)} P_i P_j \approx \beta_{ii}^{(P)} P_i^2 \cong \beta P_{eff}^2 \quad \text{and} \quad \sum_{j=1}^{S_A} \beta_{ij}^{(A)} A_i A_j \approx \beta_{ii}^{(A)} A_i^2 \cong \beta A_{eff}^2. \quad (\text{S3})$$

To incorporate interspecific competitions into the model, we write the species competition terms in Eq. (1)

in the main text as

$$\sum_{j=1}^{S_P} \beta_{ij}^{(P)} P_i P_j \cong \frac{\sum_{i=1}^{S_P} \sum_{j=1}^{S_P} \beta_{ij}^{(P)}}{\sum_{i=1}^{S_P} 1} P_{eff}^2 = \beta P_{eff}^2, \quad (S4)$$

$$\sum_{j=1}^{S_A} \beta_{ij}^{(A)} A_i A_j \cong \frac{\sum_{i=1}^{S_A} \sum_{j=1}^{S_A} \beta_{ij}^{(A)}}{\sum_{i=1}^{S_A} 1} A_{eff}^2 = \beta A_{eff}^2.$$

Thirdly, for effectively representing the mutualistic interactions in the network, we first calculate the mutualistic strength of every single species, as follows:

$$\sum_{j=1}^{S_P} \gamma_{ij}^{(A)} P_j = \sum_{j=1}^{S_P} \frac{\gamma_0}{k_{A_i}^t} \varepsilon_{ij} P_j \cong \gamma_0 k_{A_i}^{(1-t)} P_{eff} \quad \text{and} \quad \sum_{j=1}^{S_A} \gamma_{ij}^{(P)} A_j = \sum_{j=1}^{S_A} \frac{\gamma_0}{k_{P_i}^t} \varepsilon_{ij} A_j \cong \gamma_0 k_{P_i}^{(1-t)} A_{eff}. \quad (S5)$$

We then calculate the average mutualistic interacting strength in the system. There can be a variety of choices as to how the averaging process is carried out. Here we consider three methods: unweighted, degree weighted, and eigenvector weighted. For the unweighted method, we have

$$\langle \gamma_P \rangle = \frac{\sum_{i=1}^{S_P} \gamma_0 k_{P_i}^{1-t}}{\sum_{i=1}^{S_P} 1} \quad \text{and} \quad \langle \gamma_A \rangle = \frac{\sum_{i=1}^{S_A} \gamma_0 k_{A_i}^{1-t}}{\sum_{i=1}^{S_A} 1}. \quad (S6)$$

For the degree-weighted method, we have

$$\langle \gamma_P \rangle = \frac{\sum_{i=1}^{S_P} \gamma_0 k_{P_i}^{1-t} \times k_{P_i}}{\sum_{i=1}^{S_P} k_{P_i}} \quad \text{and} \quad \langle \gamma_A \rangle = \frac{\sum_{i=1}^{S_A} \gamma_0 k_{A_i}^{1-t} \times k_{A_i}}{\sum_{i=1}^{S_A} k_{A_i}}. \quad (S7)$$

Where  $k_{P_i}$  and  $k_{A_i}$  are the numbers of mutualistic interacting links associated with  $P_i$  and  $A_i$ , respectively. For the eigenvector-weighted method, we calculate the averaging quantities for pollinators and plants based on the eigenvector associated with the largest eigenvalue of the respective projection networks. Let  $M_P$  and  $M_A$  be the projection matrices of the plants and pollinators, respectively. We have

$$M_P = M^T \times M, \quad V_P = \text{eigenvector}(M_P) \quad \text{and} \quad M_A = M \times M^T, \quad V_A = \text{eigenvector}(M_A), \quad (S8)$$

where  $M$  is the  $m \times n$  matrix characterizing the original bipartite network with  $m$  and  $n$  being the numbers of pollinators and plants, respectively),  $V_P$  and  $V_A$  are the components of the eigenvector associated with the



largest eigenvalue of  $M_P$  and  $M_A$ , respectively. We then get

$$\langle \gamma_P \rangle = \frac{\sum_{i=1}^{S_P} \gamma_0 k_{P_i}^{1-t} \times V_P^{(i)}}{\sum_{i=1}^{S_P} V_P^{(i)}} \quad \text{and} \quad \langle \gamma_A \rangle = \frac{\sum_{i=1}^{S_A} \gamma_0 k_{A_i}^{1-t} \times V_A^{(i)}}{\sum_{i=1}^{S_A} V_A^{(i)}}, \quad (\text{S9})$$

where  $V_P^{(i)}$  and  $V_A^{(i)}$  are the  $i^{\text{th}}$  component of  $V_P$  and  $V_A$ , respectively.

## SI Appendix Note 2: Description of the 59 real mutualistic networks

| Index | # Pollinators | # Plants | Linkage | Network Location                        |
|-------|---------------|----------|---------|-----------------------------------------|
| 1     | 101           | 84       | 0.04    | Cordón del Cepo, Chile                  |
| 2     | 64            | 43       | 0.07    | Cordón del Cepo, Chile                  |
| 3     | 25            | 36       | 0.09    | Cordón del Cepo, Chile                  |
| 4     | 102           | 12       | 0.14    | Central New Brunswick,<br>Canada        |
| 5     | 275           | 96       | 0.03    | Pikes Peak, Colorado, USA               |
| 6     | 61            | 17       | 0.14    | Hickling, Norfolk, UK                   |
| 7     | 36            | 16       | 0.15    | Shelfanger, Norfolk, UK                 |
| 8     | 38            | 11       | 0.25    | Tenerife, Canary Islands                |
| 9     | 118           | 24       | 0.09    | Latnjajaure, Abisko, Sweden             |
| 10    | 76            | 31       | 0.19    | Zackenbergl                             |
| 11    | 13            | 14       | 0.29    | Mauritius Island                        |
| 12    | 55            | 29       | 0.09    | Garajonay, Gomera, Spain                |
| 13    | 56            | 9        | 0.2     | KwaZulu-Natal region, South<br>Africa   |
| 14    | 81            | 29       | 0.08    | Hazen Camp, Ellesmere Island,<br>Canada |
| 15    | 666           | 131      | 0.03    | Daphnã, Athens, Greece                  |
| 16    | 179           | 26       | 0.09    | Doñana National Park, Spain             |
| 17    | 79            | 25       | 0.15    | Bristol, England                        |
| 18    | 108           | 36       | 0.09    | Hestehaven, Denmark                     |
| 19    | 85            | 40       | 0.08    | Snowy Mountains, Australia              |
| 20    | 91            | 20       | 0.1     | Hazen Camp, Ellesmere Island,<br>Canada |
| 21    | 677           | 91       | 0.02    | Ashu, Kyoto, Japan                      |
| 22    | 45            | 21       | 0.09    | Laguna Diamante, Mendoza,<br>Argentina  |

**Table S1 – continued from previous page**

| <b>Index</b> | <b># Pollinators</b> | <b># Plants</b> | <b>Linkage</b> | <b>Network Location</b>                    |
|--------------|----------------------|-----------------|----------------|--------------------------------------------|
| 23           | 72                   | 23              | 0.08           | Rio Blanco, Mendoza, Argentina             |
| 24           | 18                   | 11              | 0.19           | Melville Island, Canada                    |
| 25           | 44                   | 13              | 0.25           | North Carolina, USA                        |
| 26           | 54                   | 105             | 0.04           | Galapagos                                  |
| 27           | 60                   | 18              | 0.11           | Arthur's Pass, New Zealand                 |
| 28           | 139                  | 41              | 0.07           | Cass, New Zealand                          |
| 29           | 118                  | 49              | 0.06           | Craigieburn, New Zealand                   |
| 30           | 53                   | 28              | 0.07           | Guarico State, Venezuela                   |
| 31           | 49                   | 48              | 0.07           | Canaima Nat. Park, Venezuela               |
| 32           | 33                   | 7               | 0.28           | Brownfield, Illinois, USA                  |
| 33           | 34                   | 13              | 0.32           | Ottawa, Canada                             |
| 34           | 128                  | 26              | 0.09           | Chiloe, Chile                              |
| 35           | 36                   | 61              | 0.08           | Morant Point, Jamaica                      |
| 36           | 12                   | 10              | 0.25           | Flores, AÃores Island                     |
| 37           | 40                   | 10              | 0.18           | Hestehaven, Denmark                        |
| 38           | 42                   | 8               | 0.24           | Hestehaven, Denmark                        |
| 39           | 51                   | 17              | 0.15           | Tenerife, Canary Islands                   |
| 40           | 43                   | 29              | 0.09           | Windsor, The Cockpit Country, Jamaica      |
| 41           | 43                   | 31              | 0.11           | Syndicate, Dominica                        |
| 42           | 6                    | 12              | 0.35           | Puerto Villamil, Isabela Island, Galapagos |
| 43           | 82                   | 28              | 0.11           | Hestehaven, Denmark                        |
| 44           | 609                  | 110             | 0.02           | Amami-Ohsima Island, Japan                 |
| 45           | 26                   | 17              | 0.14           | Uummannaq Island, Greenland                |
| 46           | 44                   | 16              | 0.39           | Denmark                                    |
| 47           | 186                  | 19              | 0.12           | Isenbjerg                                  |

**Table S1 – continued from previous page**

| <b>Index</b> | <b># Pollinators</b> | <b># Plants</b> | <b>Linkage</b> | <b>Network Location</b>                       |
|--------------|----------------------|-----------------|----------------|-----------------------------------------------|
| 48           | 236                  | 30              | 0.09           | Denmark                                       |
| 49           | 225                  | 37              | 0.07           | Denmark                                       |
| 50           | 35                   | 14              | 0.18           | Tenerife, Canary Islands                      |
| 51           | 90                   | 14              | 0.13           | Nahuel Huapi National Park,<br>Argentina      |
| 52           | 39                   | 15              | 0.16           | Tundra, Greenladn                             |
| 53           | 294                  | 99              | 0.02           | Mt. Yufu, Japan                               |
| 54           | 318                  | 113             | 0.02           | Kyoto City, Japan                             |
| 55           | 195                  | 64              | 0.03           | Nakaikemi marsh, Fukui Prefec-<br>ture, Japan |
| 56           | 365                  | 91              | 0.03           | Mt. Kushigata, Yamanashi<br>Pref., Japan      |
| 57           | 883                  | 114             | 0.02           | Kibune, Kyoto, Japan                          |
| 58           | 81                   | 32              | 0.12           | Parc Natural del Cap de Creus                 |
| 59           | 13                   | 13              | 0.42           | Parque Nacional do Catimbau                   |

**table S1.** The 59 real pollinator-plant networks are from web-of-life (<http://www.web-of-life.es>). For each network, the linkage is normalized with respect to the corresponding fully connected (all-to-all) network for which the linkage is 100%.

### SI Appendix Note 3: Steady state solutions of the pollinator and plant abundances

The steady state solutions of the reduced model can be obtained by setting  $dP_{eff}/dt = 0$  and  $dA_{eff}/dt = 0$ , which gives

$$\begin{aligned} f(P', A') &= \alpha P' - \beta P'^2 + \frac{\langle \gamma_P \rangle A'}{1 + h \langle \gamma_P \rangle A'} P' + \mu = 0, \\ g(P', A') &= \alpha A' - \beta A'^2 + \frac{\langle \gamma_A \rangle P'}{1 + h \langle \gamma_A \rangle P'} A' + \mu = 0, \end{aligned} \quad (\text{S10})$$

where  $A'$  and  $P'$  denote the effective pollinator and plant abundances in the steady state, respectively. The Jacobian matrix evaluated at a steady-state solution is

$$J = \begin{Bmatrix} \alpha - 2P'\beta + \frac{h\langle \gamma_P \rangle A'}{1+h\langle \gamma_P \rangle A'} & -\frac{h^2\langle \gamma_P \rangle^2 A' P'}{(1+h\langle \gamma_P \rangle A')^2} + \frac{h\langle \gamma_P \rangle P'}{1+h\langle \gamma_P \rangle A'} \\ -\frac{h^2\langle \gamma_A \rangle^2 A' P'}{(1+h\langle \gamma_A \rangle P')^2} + \frac{h\langle \gamma_A \rangle A'}{1+h\langle \gamma_A \rangle P'} & \alpha - 2A'\beta - \kappa + \frac{h\langle \gamma_A \rangle P'}{1+h\langle \gamma_A \rangle P'} \end{Bmatrix}. \quad (\text{S11})$$

We solve Eq. (S10) to get

$$\begin{aligned} P' &= \frac{1}{-2\beta} \left[ -\left( \alpha + \frac{\langle \gamma_P \rangle A'}{1 + h \langle \gamma_P \rangle A'} \right) \pm \left( \left( \alpha + \frac{\langle \gamma_P \rangle A'}{1 + h \langle \gamma_P \rangle A'} \right)^2 + 4\beta\mu \right)^{1/2} \right], \\ A' &= \frac{1}{-2\beta} \left[ -\left( \alpha - \kappa + \frac{\langle \gamma_A \rangle P'}{1 + h \langle \gamma_A \rangle P'} \right) \pm \left( \left( \alpha - \kappa + \frac{\langle \gamma_A \rangle P'}{1 + h \langle \gamma_A \rangle P'} \right)^2 + 4\beta\mu \right)^{1/2} \right]. \end{aligned} \quad (\text{S12})$$

The physically meaningful solutions of  $P'$  and  $A'$  have positive values. Because of the parameter setting  $|\alpha| \gg \mu = 0.0001$ , we have

$$\beta\mu \ll \left| \alpha + \frac{\langle \gamma_P \rangle A'}{1 + h \langle \gamma_P \rangle A'} \right| \text{ or } \left| \alpha - \kappa + \frac{\langle \gamma_A \rangle P'}{1 + h \langle \gamma_A \rangle P'} \right|.$$

The approximate solutions of  $P'$  and  $A'$  are then given by

$$\begin{aligned} P' &\approx \frac{1}{-2\beta} \left[ -\left( \alpha + \frac{\langle \gamma_P \rangle A'}{1 + h \langle \gamma_P \rangle A'} \right) \pm \left( \left| \alpha + \frac{\langle \gamma_P \rangle A'}{1 + h \langle \gamma_P \rangle A'} \right| + 2\beta\mu \right) \right], \\ A' &\approx \frac{1}{-2\beta} \left[ -\left( \alpha - \kappa + \frac{\langle \gamma_A \rangle P'}{1 + h \langle \gamma_A \rangle P'} \right) \pm \left( \left| \alpha - \kappa + \frac{\langle \gamma_A \rangle P'}{1 + h \langle \gamma_A \rangle P'} \right| + 2\beta\mu \right) \right]. \end{aligned} \quad (\text{S13})$$

For  $\alpha + (\langle \gamma_P \rangle A') / (1 + h \langle \gamma_P \rangle A') > 0$ , we have the following two approximate solutions of  $P'$ :

$$\begin{aligned} P'_1 &\approx -\mu, \\ P'_2 &\approx \frac{1}{\beta} \left( \alpha + \frac{\langle \gamma_P \rangle A'}{1 + h \langle \gamma_P \rangle A'} \right), \end{aligned} \quad (\text{S14})$$

where  $P'_1$  corresponds to the result in Eq. (S13) with the  $+$  sign and  $P'_2$  with the  $-$  sign. The corresponding solutions  $A'_1$  and  $A'_2$  can be obtained accordingly.

For  $\alpha + (\langle \gamma_P \rangle A')(1 + h \langle \gamma_P \rangle A') < 0$ , we have

$$\begin{aligned} P'_1 &\approx \frac{1}{\beta} \left( \alpha + \frac{\langle \gamma_P \rangle A'}{1 + h \langle \gamma_P \rangle A'} \right), \\ P'_2 &\approx \mu. \end{aligned} \tag{S15}$$

For  $\alpha - \kappa + (\langle \gamma_A \rangle P')(1 + h \langle \gamma_A \rangle P') > 0$ , we have

$$\begin{aligned} A'_1 &\approx -\mu, \\ A'_2 &\approx \frac{1}{\beta} \left( \alpha - \kappa + \frac{\langle \gamma_A \rangle P'}{1 + h \langle \gamma_A \rangle P'} \right). \end{aligned} \tag{S16}$$

For  $\alpha - \kappa + (\langle \gamma_A \rangle P')(1 + h \langle \gamma_A \rangle P') < 0$ , we have

$$\begin{aligned} A'_1 &\approx \frac{1}{\beta} \left( \alpha - \kappa + \frac{\langle \gamma_A \rangle P'}{1 + h \langle \gamma_A \rangle P'} \right), \\ A'_2 &\approx \mu. \end{aligned} \tag{S17}$$

## SI Appendix References

- [1] Egbert H van Nes and Marten Scheffer. Large species shifts triggered by small forces. *Amer. Nat.*, 164(2):255–266, 2004.
